# Supplementary material for: Downsizing the molecular spring of the giant protein titin reveals that skeletal muscle titin determines passive stiffness and drives longitudinal hypertrophy
Source: eLife journal article supplement (doi:10.7554/elife.40532), 2018-12-19
Supplement: figures [file elife-40532-figures-v2.pdf]

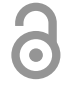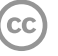

---

## Figures and figure supplements

Downsizing the molecular spring of the giant protein titin reveals that skeletal muscle titin determines passive stiffness and drives longitudinal hypertrophy

**Ambjorn Brynnel et al**

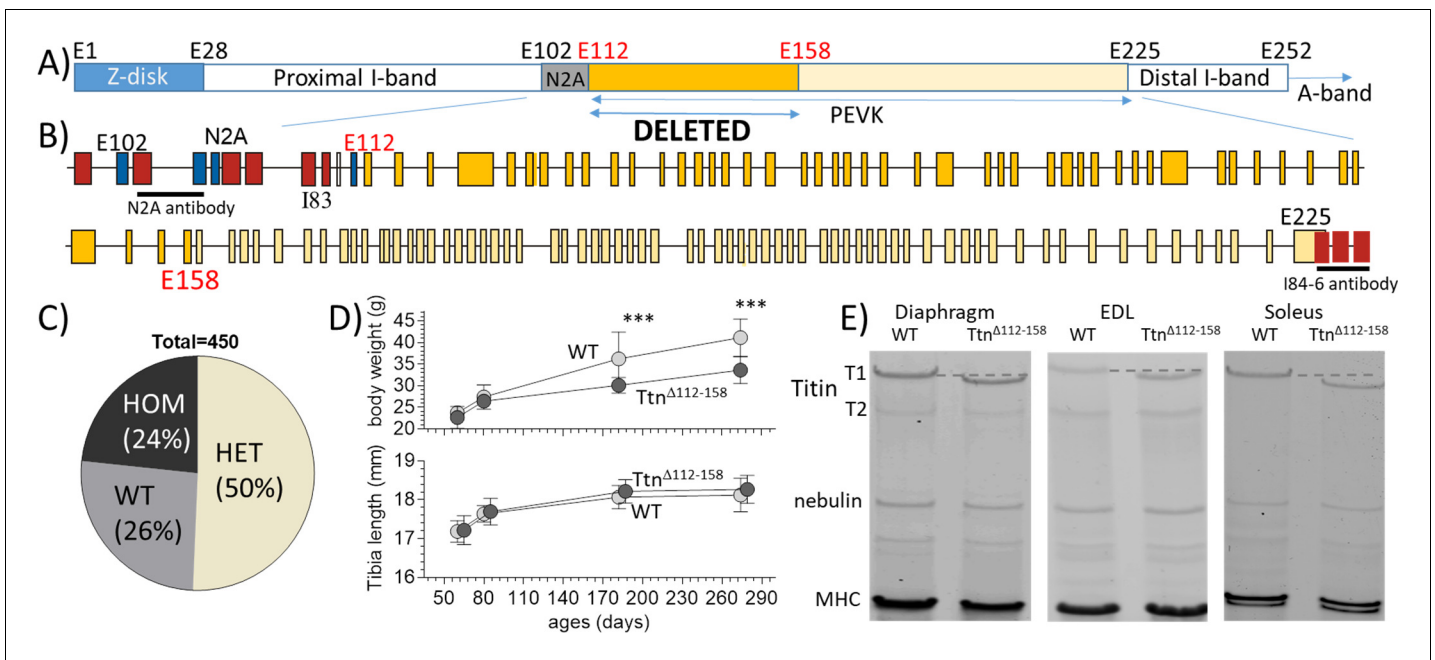

**Figure 1.** The *Ttn*<sup>Δ112-158</sup> mouse model. (A and B) Titin's I-band region is shown schematically in (A) and the exon composition of the PEVK and flanking region is indicated in B). The region targeted for deletion is highlighted. (Yellow: PEVK exons; dark yellow: targeted exons; red: Ig domains, blue: unique sequence; the horizontal lines indicate the binding sites of the antibodies used in **Figure 3**). (C) Genotype distribution of mice born to heterozygous parents is Mendelian. (D) Comparison between WT and homozygous *Ttn*<sup>Δ112-158</sup> mice of body weight (top) and Tibia length (bottom). Two-way ANOVA reveals a significantly reduced BW in *Ttn*<sup>Δ112-158</sup> mice with a multiple comparison analysis revealing a significant reduction at 180 and 275 days. No significant differences in tibia length were found. (All male mice, for female mice, see S1B). (E) Protein Gels. Full-length titin (T1) has a higher mobility in *Ttn*<sup>Δ112-158</sup> mice but the mobility of T2 is the same. (T2 is a degradation product of T1 that is present in diaphragm and EDL but absent in soleus). MHC: myosin heavy chain.

DOI: <https://doi.org/10.7554/eLife.40532.002>

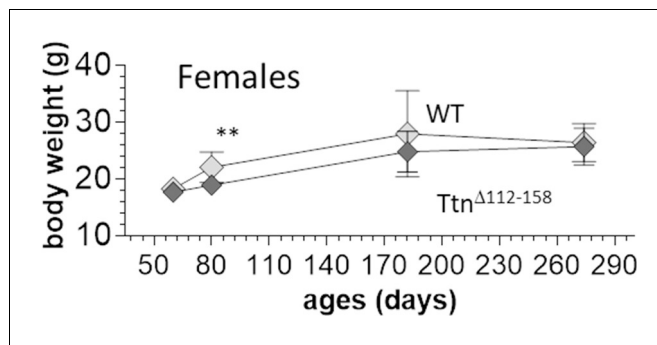

**Figure 1—figure supplement 1.** Body weight comparison between WT and homozygous  $Ttn^{\Delta 112-158}$  female mice. Two-way ANOVA reveals a significantly reduced BW in  $Ttn^{\Delta 112-158}$  with a multiple comparison analysis revealing a significant reduction at 80 days. Note that the number of mice was less at 290 d (5 mice), likely explaining the relatively low WT weights.

DOI: <https://doi.org/10.7554/eLife.40532.003>

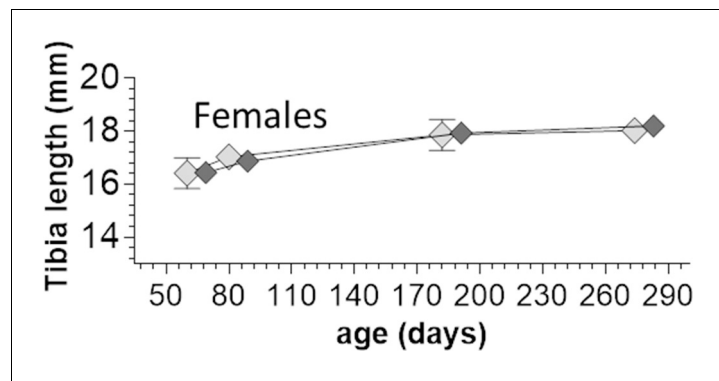

**Figure 1—figure supplement 2.** Tibia length comparison between WT and homozygous *Ttr*<sup>Δ112-158</sup> female mice. Two-way ANOVA reveals no significant differences in tibia length between the genotypes.

DOI: <https://doi.org/10.7554/eLife.40532.004>

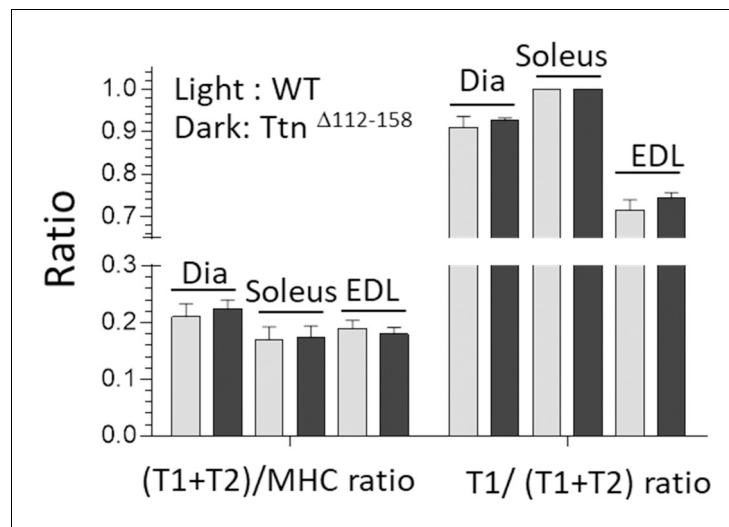

**Figure 1—figure supplement 3.** Titin expression analysis. The total amount of titin, T1 + T2 (relative to myosin heavy chain, MHC) and the fractional content of T1 (relative to total titin) are unaltered in the *Ttn* <sup>$\Delta 112-158$</sup>  mice.

DOI: <https://doi.org/10.7554/eLife.40532.005>

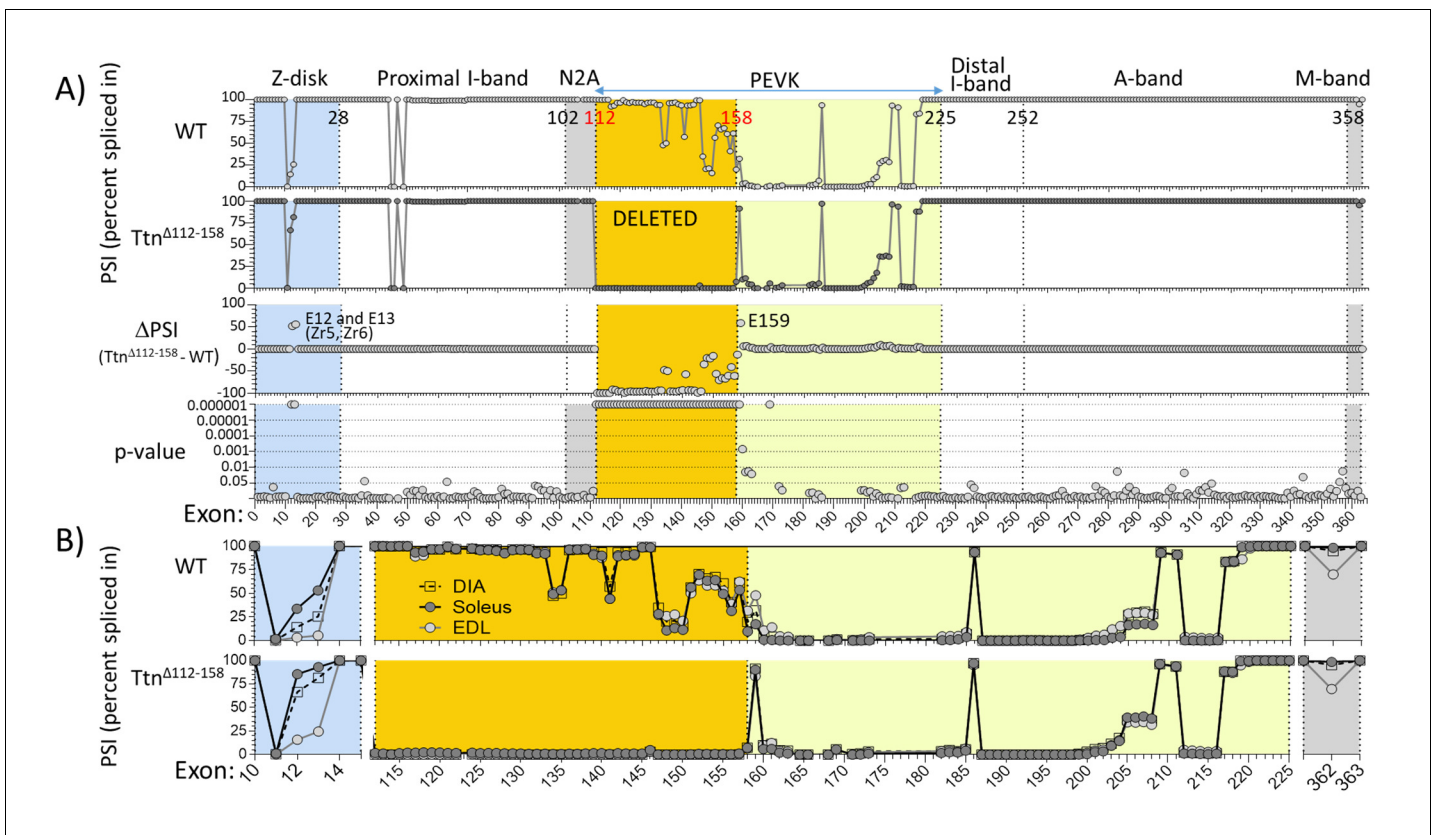

**Figure 2.** Titin exon expression analysis. (A) RNAseq-based titin exon expression of diaphragm muscle, expressed as percent spliced-in (PSI) in WT and *Ttn*<sup>Δ112-158</sup> mice (top and bottom), and the PSI difference between the two genotypes and the p-value of PSI difference (bottom and above). The targeted exons are absent in the *Ttn*<sup>Δ112-158</sup> mouse with minimal changes in the Z-disk and M-band. (p-value scale is  $-\log(p\text{-value})$  with values  $> 6$  shown as 6.) (B) PSI of Diaphragm, EDL and soleus muscle of WT (top) and *Ttn*<sup>Δ112-158</sup> (bottom) mice. Only shown are areas within the gene where PSI differences exist between the genotypes. Z-disk (blue), PEVK (yellow) and M-band (gray). Zr: Z repeat.

DOI: <https://doi.org/10.7554/eLife.40532.006>

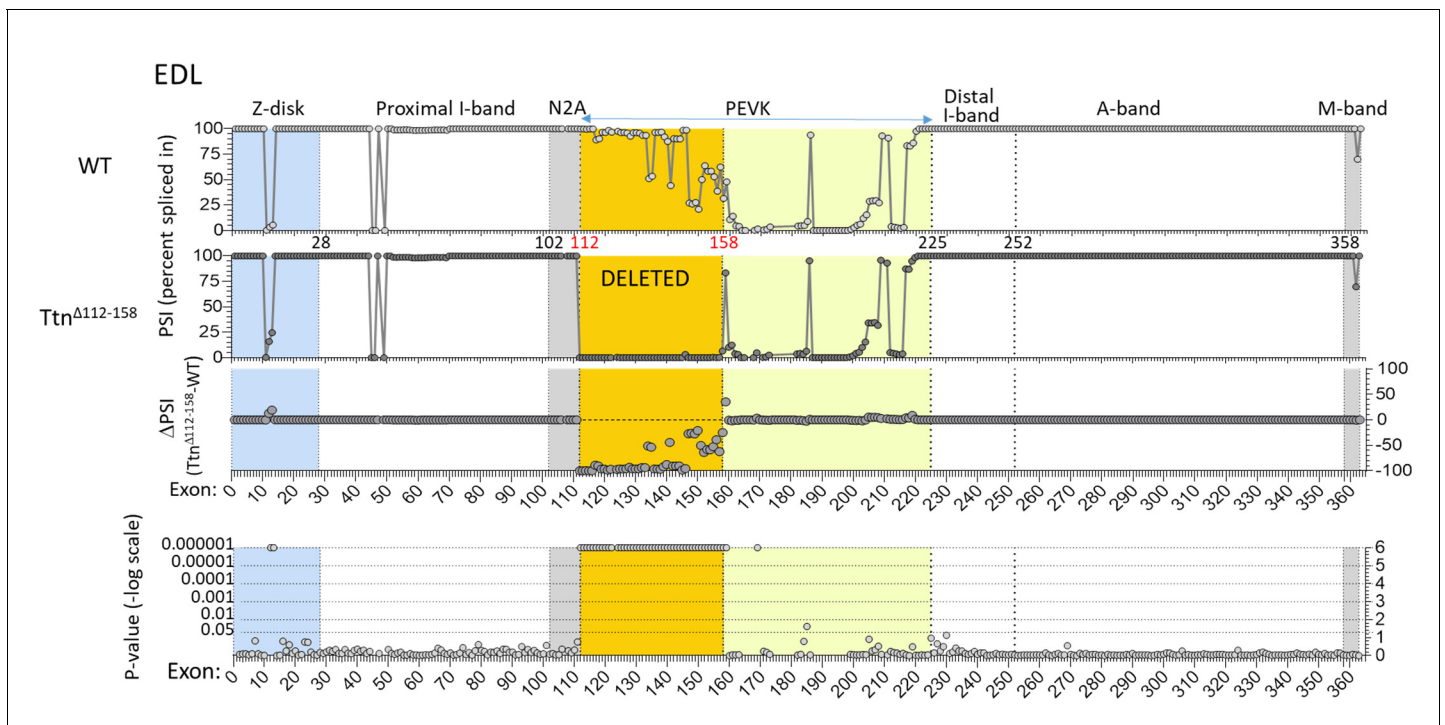

**Figure 2—figure supplement 1.** Titin expression analysis in EDL muscle. RNAseq-based titin exon expression of EDL muscle, expressed as percent spliced-in (PSI) in WT and *Ttn*<sup>Δ112-158</sup> mice (top and below), and the PSI difference between the two genotypes and the p-value of the PSI difference (bottom and above). The targeted exons are absent in the *Ttn*<sup>Δ112-158</sup> mouse with minimal changes elsewhere. p-value scale is  $-\log(p\text{-value})$  with values > 6 shown as 6.

DOI: <https://doi.org/10.7554/eLife.40532.007>

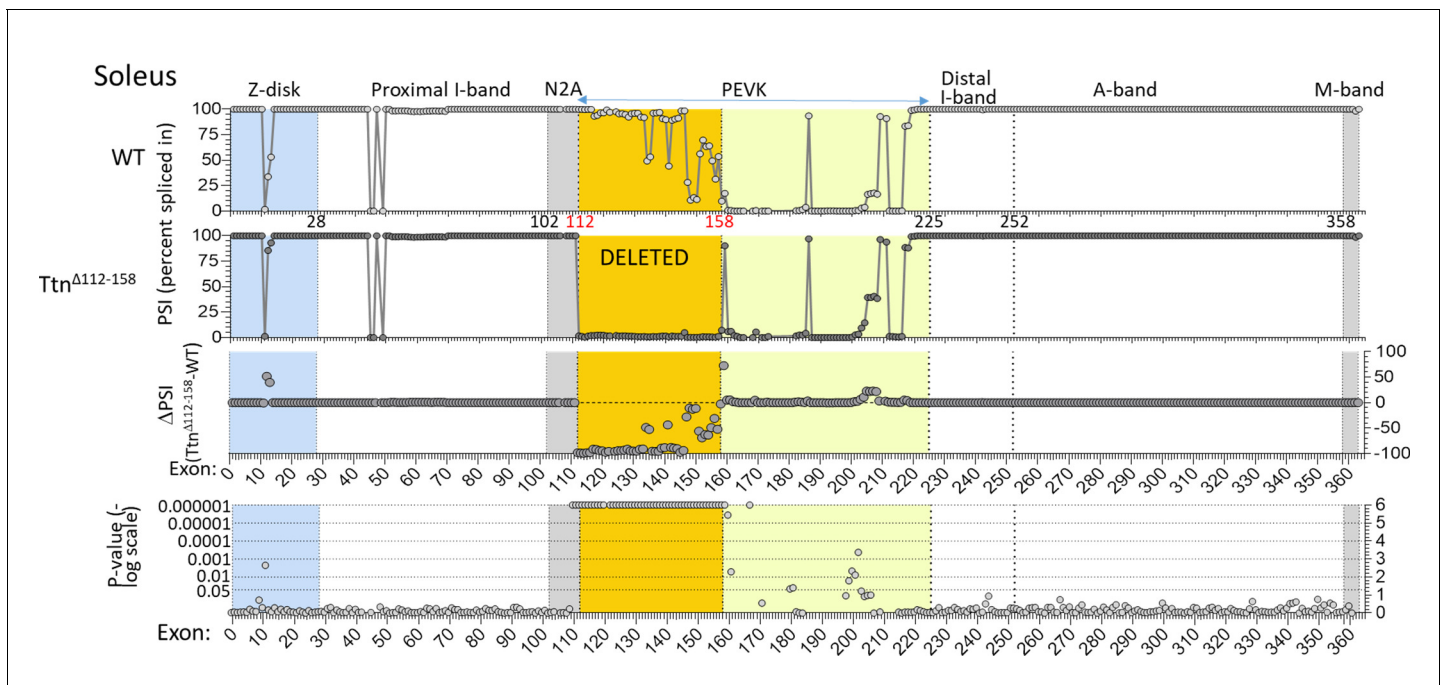

**Figure 2—figure supplement 2.** Titin expression analysis in soleus muscle. RNAseq-based titin exon expression of EDL muscle, expressed as percent spliced-in (PSI) in WT and *Ttn*<sup>Δ112-158</sup> mice (top and below), and the PSI difference between the two genotypes and the p-value of the PSI difference (bottom and above). The targeted exons are absent in the *Ttn*<sup>Δ112-158</sup> mouse with minimal changes elsewhere. The p-value scale is  $-\log(p\text{-value})$  with values  $> 6$  shown as 6.

DOI: <https://doi.org/10.7554/eLife.40532.008>



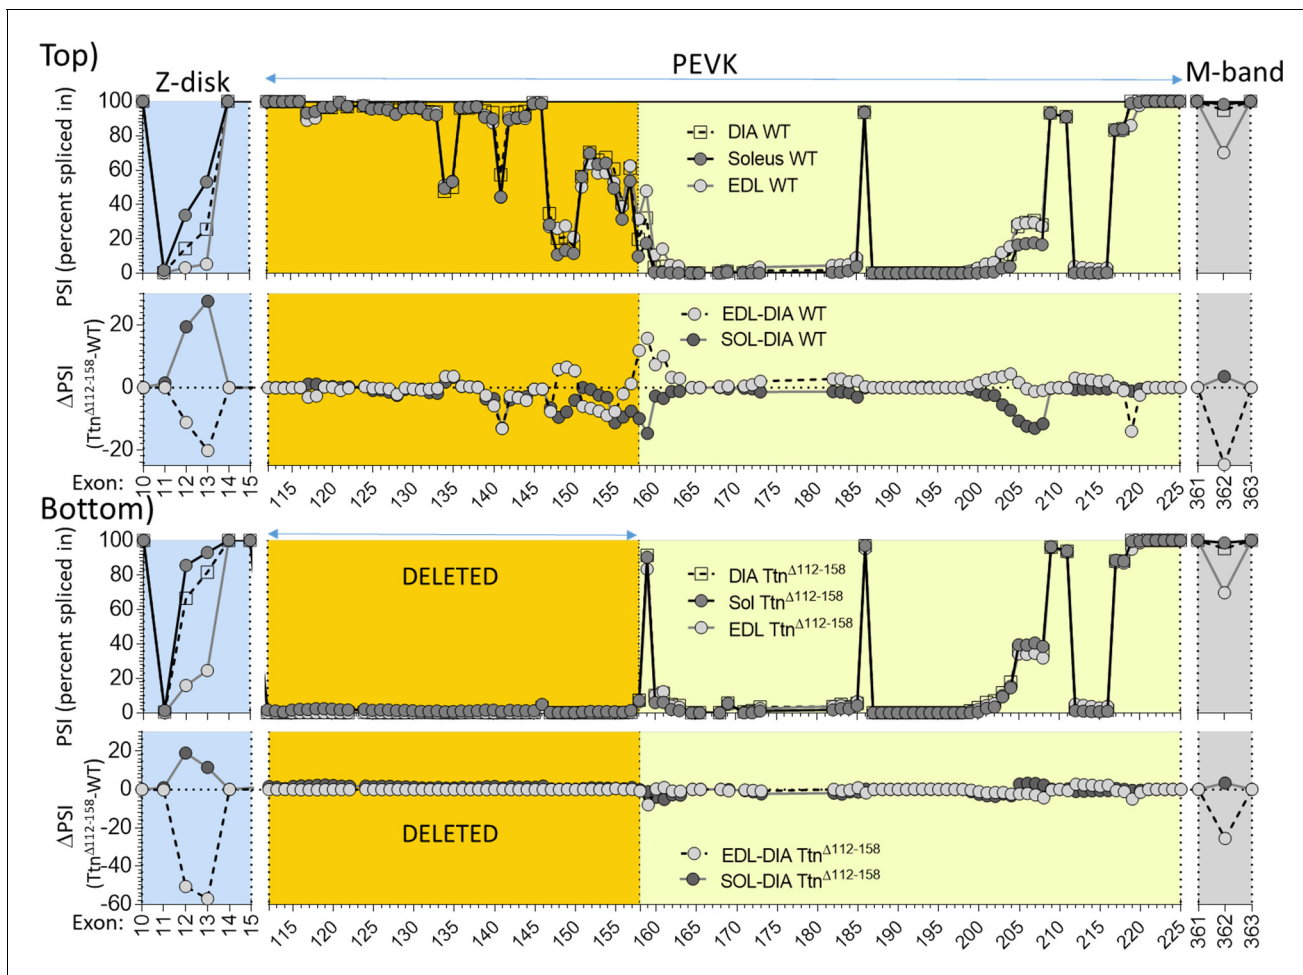

**Figure 2—figure supplement 3.** Titin expression analysis in diaphragm, EDL and soleus muscle, in part of Z-disk, complete PEVK and part of M-band regions. Top: superimposed results of WT (top) and PSI difference between EDL and diaphragm and between soleus and diaphragm (bottom). Bottom: superimposed results of  $Ttn^{\Delta 112-158}$  mice (top) and PSI difference between EDL and Diaphragm and between soleus and diaphragm (bottom).

DOI: <https://doi.org/10.7554/eLife.40532.009>

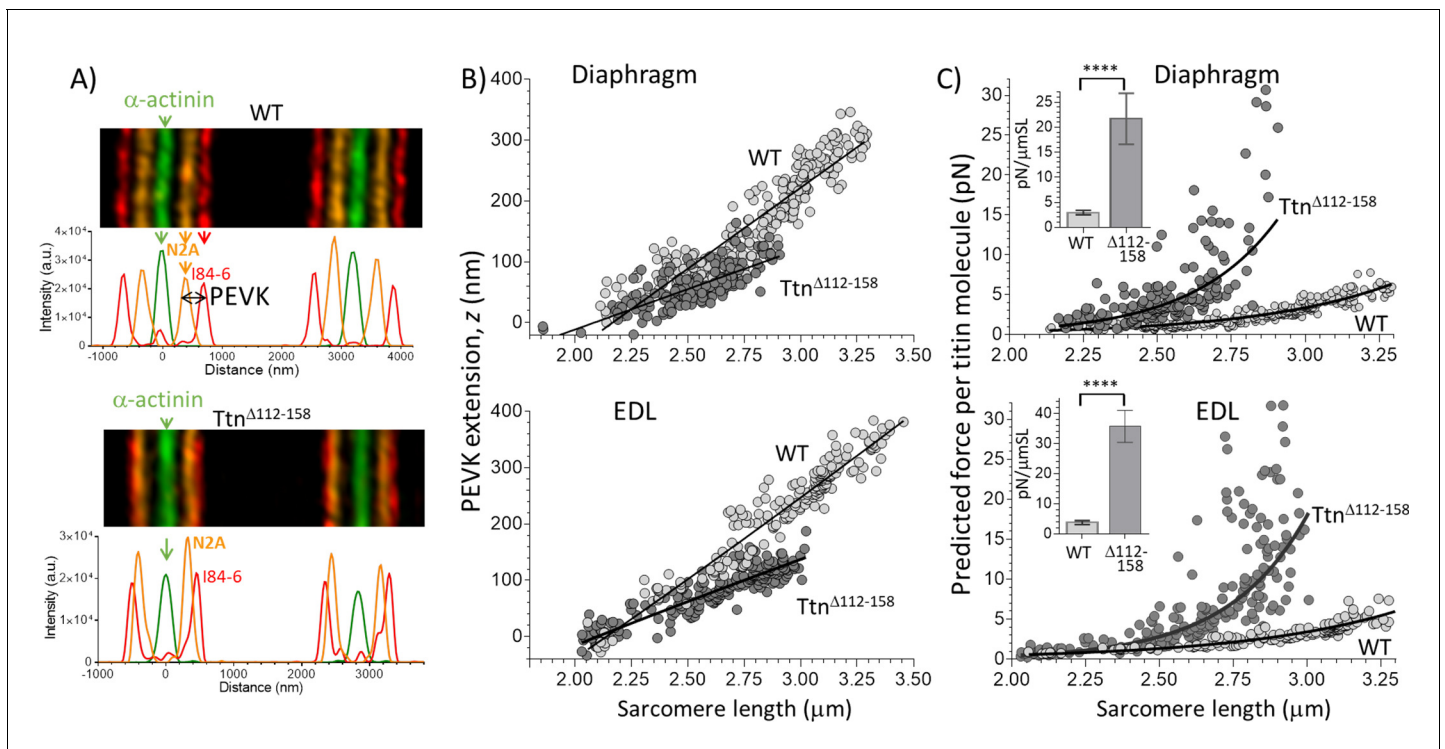

**Figure 3.** Extension of the PEVK segment and predicted titin-based force. (A) Example immuno-fluorescence images and densitometry of sarcomeres labeled with N2A and I84-86 antibodies that flank the PEVK (**Figure 1B** shows binding sites). (B) PEVK extension ( $z$ ) as function of sarcomere length in muscles stretched to different lengths. (C) Force per titin molecule as a function of sarcomere length. Inset shows the average stiffness of titin in the 2.45–2.75  $\mu\text{m}$  SL range. The measured PEVK extension predicts a large increase in titin-based stiffness in  $Ttn^{\Delta 112-158}$ .

DOI: <https://doi.org/10.7554/eLife.40532.011>

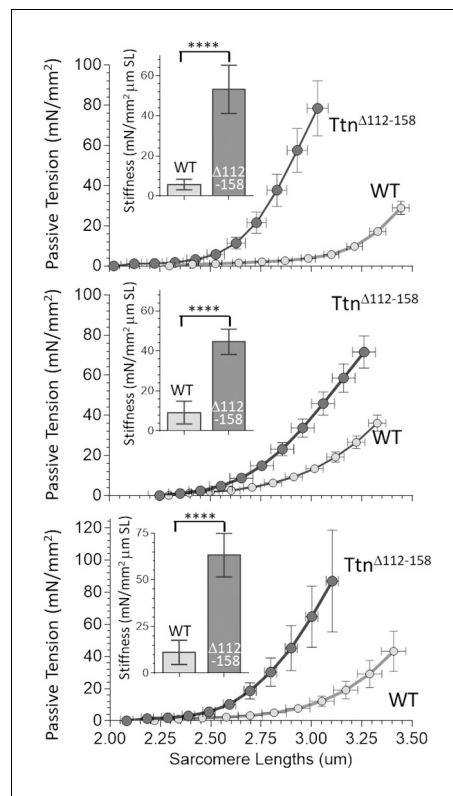

**Figure 4.** Passive Muscle stiffness. The passive tension – sarcomere length relation was determined in Diaphragm (top), EDL (middle) and soleus (bottom) intact muscle from WT and *Ttn*<sup>Δ112-158</sup> mice. Passive tension is highly increased in *Ttn*<sup>Δ112-158</sup>. The insets show average passive stiffness in the 2.45–2.75 μm SL range. Passive stiffness is increased ~5–10 fold in *Ttn*<sup>Δ112-158</sup> mice.

DOI: <https://doi.org/10.7554/eLife.40532.012>

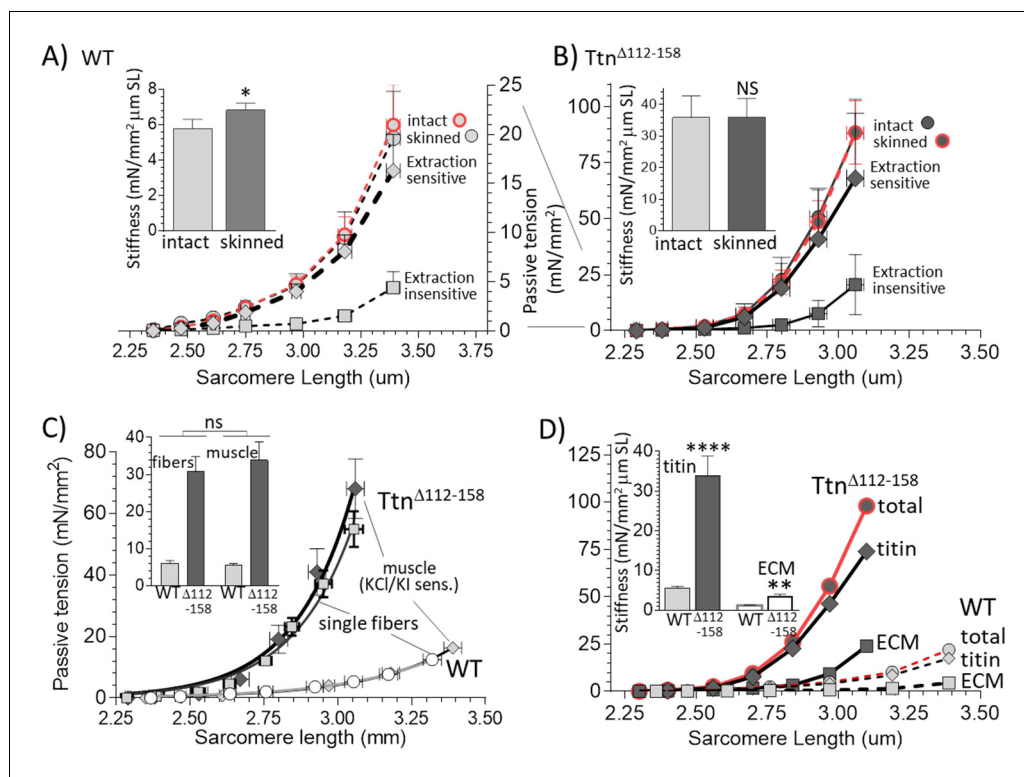

**Figure 5.** Functionally dissecting passive muscle stiffness. (A and B) Passive tension in EDL muscle (5th toe muscle) was measured in intact muscle, then again after skinning, and a final time after KCl/KI extraction (extraction insensitive tension). The tension is minimally affected by skinning and tensions before and after skinning largely overlap. The difference between before and after KCl/KI extraction is the extraction-sensitive tension. (A) WT, (B)  $Ttn^{\Delta 112-158}$  muscles (note ~4 fold different vertical scales). Insets of A and B show passive stiffness of intact and skinned muscle (SL range 2.45–2.75  $\mu\text{m}$ ). Skinning minimally impacts passive stiffness. (C) Comparison of extraction sensitive muscle tension with the passive tension of mechanically skinned single EDL fibers. The inset shows the average stiffness (SL range 2.45–2.75  $\mu\text{m}$ ) for single fibers (left two bars) and whole muscle (right two bars). Results are not significantly different, supporting that the extraction-sensitive tension is titin-based (see text for details). (D) Overlay of WT and  $Ttn^{\Delta 112-158}$  skinned muscle total tension, titin-based tension and ECM-based tension. The inset shows the stiffness (SL 2.45–2.75  $\mu\text{m}$ ) for titin and ECM stiffness. Both titin and ECM have increased stiffness in  $Ttn^{\Delta 112-158}$  muscles, but the effect is much larger for titin.

DOI: <https://doi.org/10.7554/eLife.40532.013>

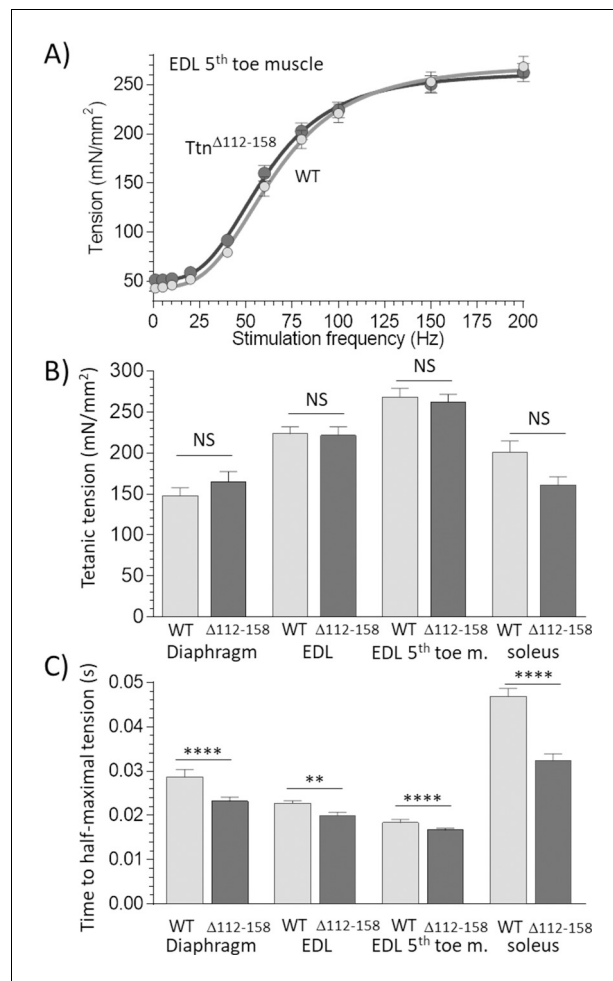

**Figure 6.** Active tension. (A) Example results of tetanic tension vs. stimulation frequency. Results of EDL 5th toe muscle are shown. Results of WT and *Ttn*<sup>Δ112-158</sup> muscles closely overlap. (B) Maximal tetanic tension in Diaphragm (150 Hz), whole EDL muscle (200 Hz), 5th toe muscle of the EDL (200 Hz) and soleus muscle (150 Hz). Two-way ANOVA reveals that there is no significant difference in maximal tetanic tension in *Ttn*<sup>Δ112-158</sup> muscles with a multiple comparison analysis revealing also no effects in individual muscle types. (C) Time to reach half-maximal active tetanic tension is significantly altered in *Ttn*<sup>Δ112-158</sup> muscles (two-way ANOVA) with a multiple comparison analysis revealing a significant reduction in all *Ttn*<sup>Δ112-158</sup> muscle types.

DOI: <https://doi.org/10.7554/eLife.40532.014>

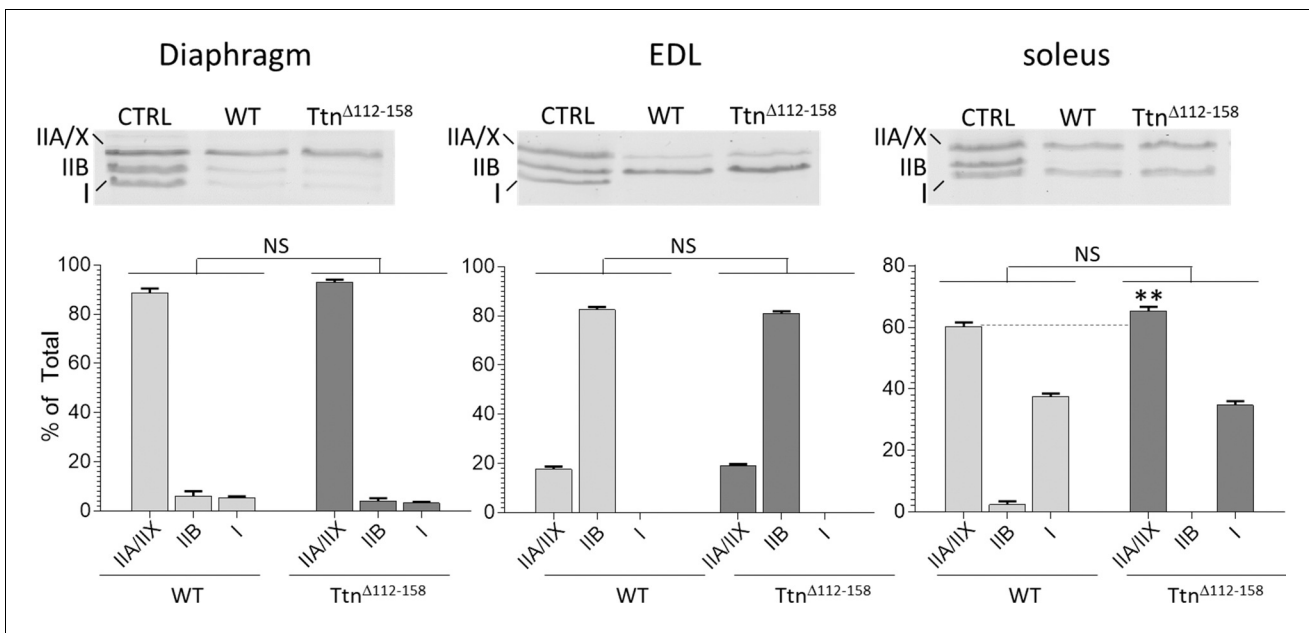

**Figure 6—figure supplement 1.** Myosin Heavy Chain (MHC) isoform analysis. Two-way ANOVA reveals that there is no significant difference in MHC isoforms in either diaphragm, EDL, or soleus *Ttn*<sup>Δ112-158</sup> muscles compared to WT controls. A multiple comparison analysis only reveals a difference in soleus muscle where IIA/IIX MHC is increased from 60% in WT to 65% in *Ttn*<sup>Δ112-158</sup> mice.

DOI: <https://doi.org/10.7554/eLife.40532.015>

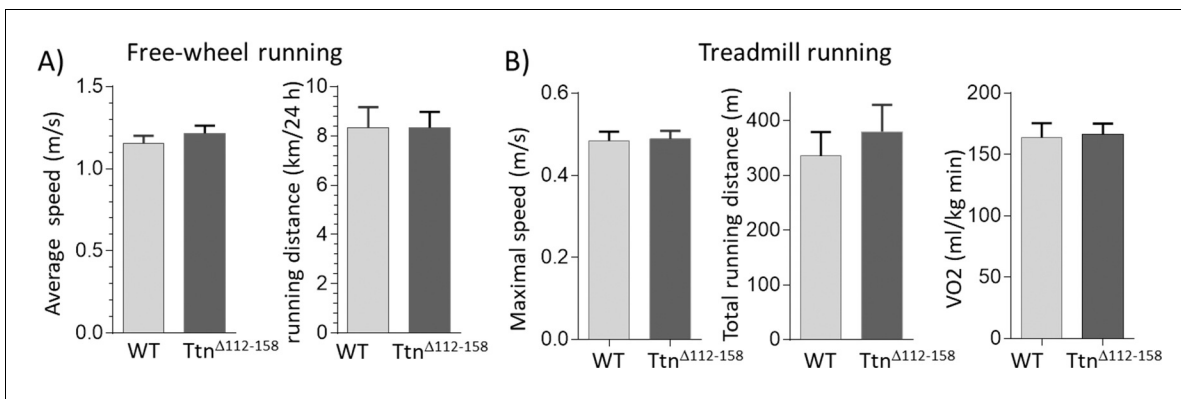

**Figure 7.** Exercise capacity. (A) Free-wheel running exercise. Left, average running speed; Right, average distance ran in a 24 hr period. There is no significant difference in running speed and running between *Ttn*<sup>Δ112-158</sup> and WT mice. (B) Treadmill running exercise in which the mice had to run uphill and at a progressively increasing speed until they failed to keep up (see Materials and methods). Maximal running speed total running distance and VO<sub>2</sub> consumption at maximal running speed (normalized to body weight) revealed no genotype effects. (Female mice were used.).

DOI: <https://doi.org/10.7554/eLife.40532.016>

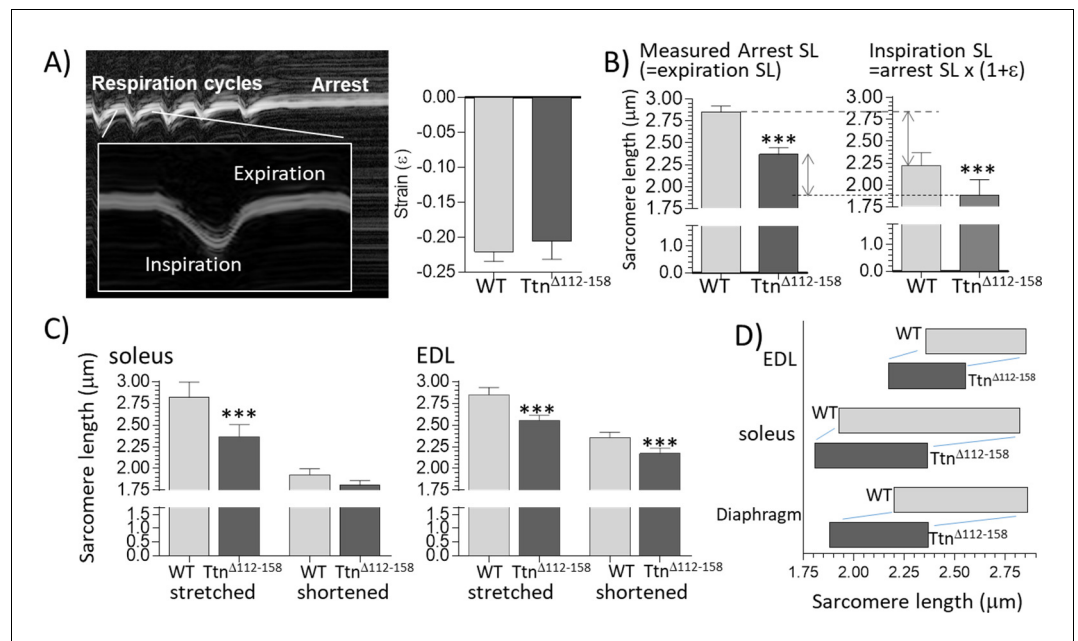

**Figure 8.** Sarcomere length working range. (A) Motion-mode Echo image of the diaphragm in a WT mouse. The change in strain was measured during inspiration (shortening) and then the mouse was perfusion-fixed which arrested the diaphragm in the expiration state. (A) Right: Strain amplitude ( $\epsilon$ ) measured on echo images during inspiration is the same in WT and  $Ttn^{\Delta 112-158}$  mice. (Strain amplitude is defined as the fractional muscle shortening during inspiration.) (B) Left: measured sarcomere length (SL) in muscle strips dissected from the perfusion-fixed diaphragm is much less in  $Ttn^{\Delta 112-158}$  than in WT mice. Right: calculated SL at end-inspiration, determined from the measured arrest SL and strain amplitude. (C) Measured sarcomere length in perfusion-fixed soleus muscle (left) and EDL muscle (right) in mice in which one hind leg was in a fully plantarflexed position while the other hind leg was held in a fully dorsiflexed position. (D) Sarcomere working range. The working range of all examined muscle types is reduced in  $Ttn^{\Delta 112-158}$  mice. (Right side of the box is the maximal length and the left side the minimal length).

DOI: <https://doi.org/10.7554/eLife.40532.017>



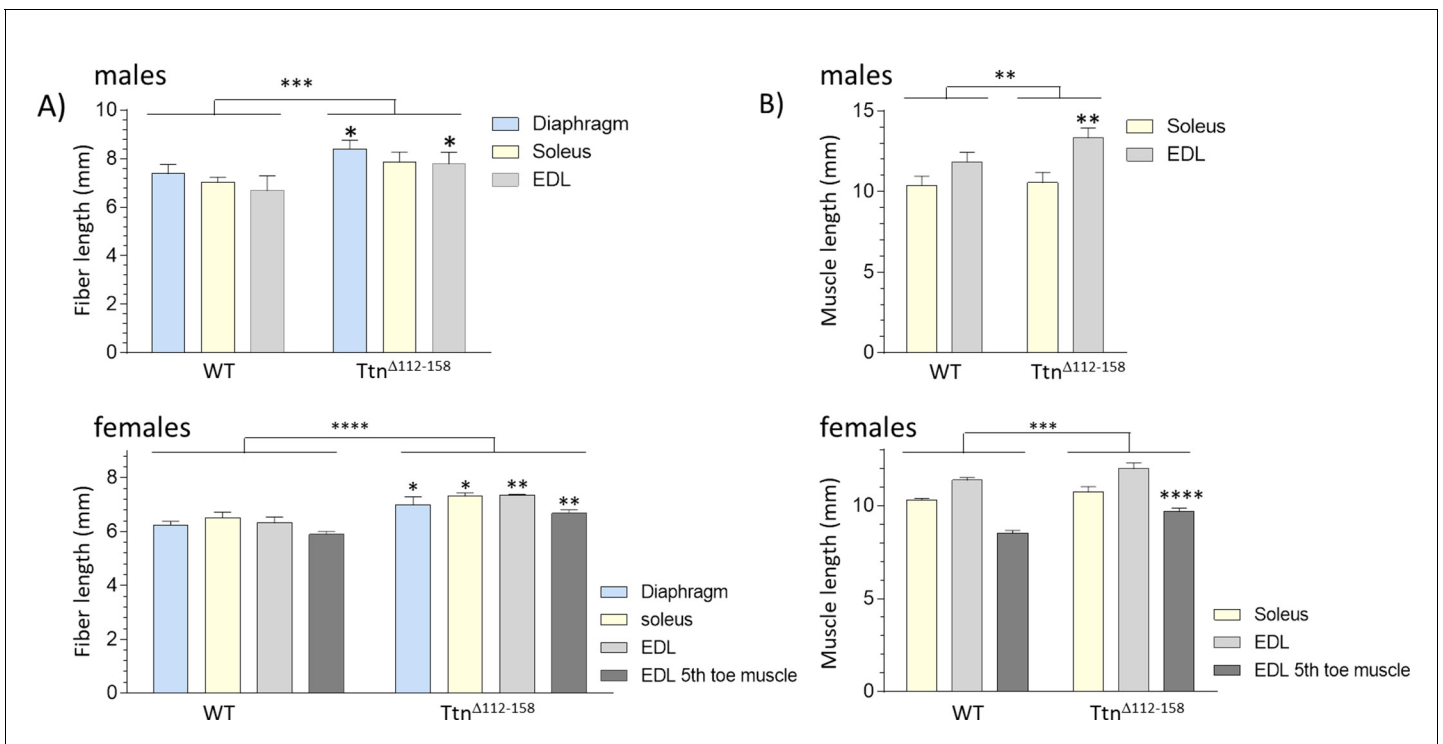

**Figure 8—figure supplement 1.** Fiber lengths and muscle lengths are increased in *Ttn*<sup>Δ112-158</sup> mice. (A) Fibers were carefully dissected from chemically fixed muscle at their slack length and their end-to-end length was measured. Fibers are longer in muscles from *Ttn*<sup>Δ112-158</sup> mice in male (top) and female (bottom) mice. (B) Since fibers do not span the full muscle length in soleus and EDL we also measured the end-to-end length of the muscle. Muscle lengths are increased in males and female *Ttn*<sup>Δ112-158</sup> mice.

DOI: <https://doi.org/10.7554/eLife.40532.018>

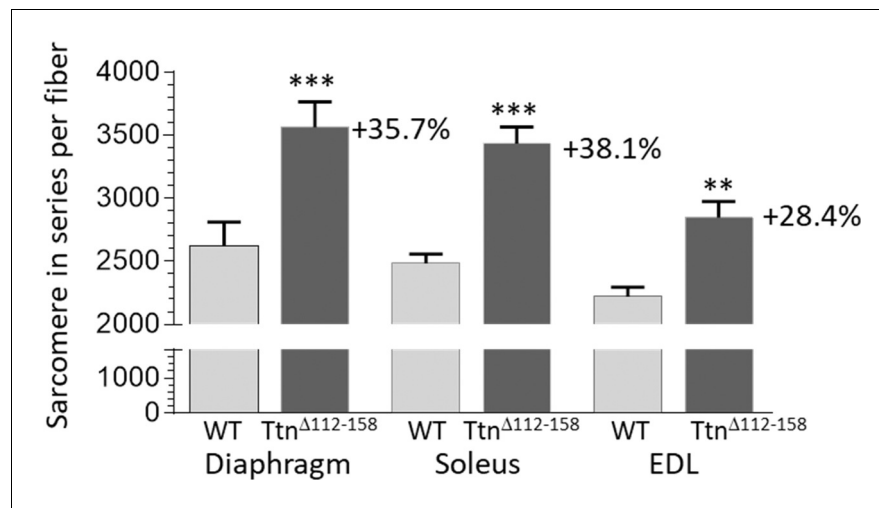

**Figure 9.** Sarcomere in series per muscle fiber. Two-way ANOVA reveals a significantly increased number of sarcomeres in single fibers in all studied muscle types in *Ttn* $\Delta$ 112-158 mice. The average increase in the number of sarcomeres in series in all muscle types is 34%.

DOI: <https://doi.org/10.7554/eLife.40532.019>

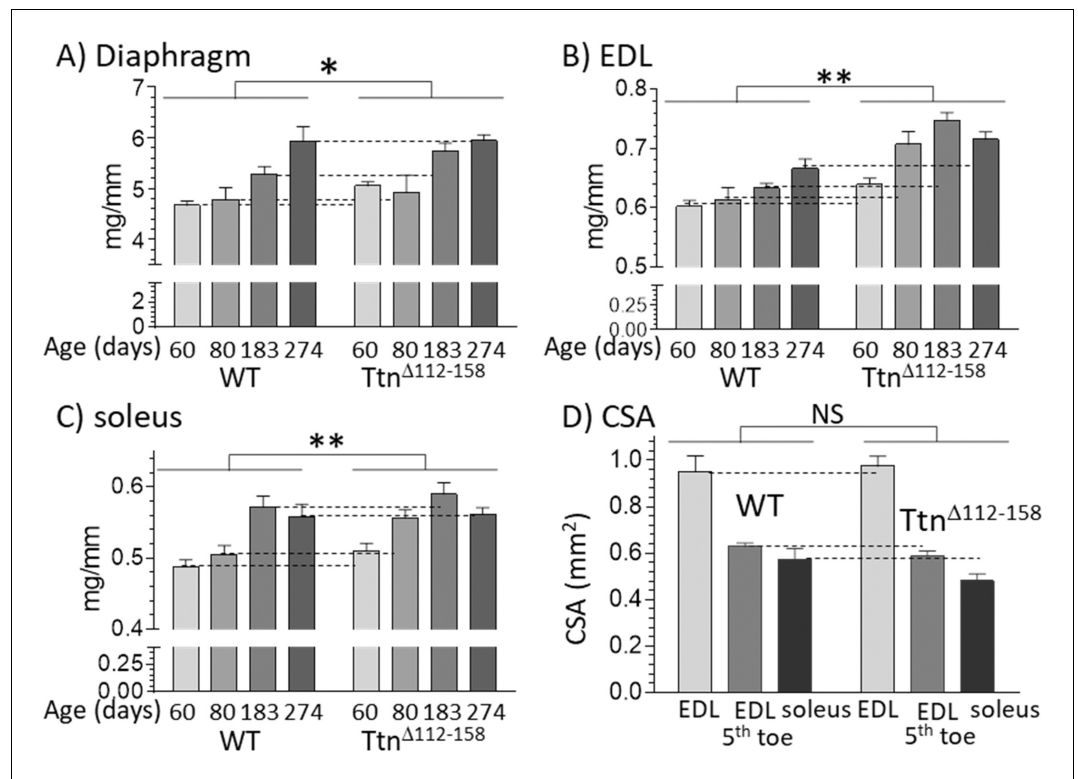

**Figure 10.** Muscles of *Ttn*<sup>Δ112-158</sup> mice are hypertrophied without an increase in cross-sectional area. (A–C) Hypertrophy is expressed as muscle weight (mg) normalized to tibia length (mm). Two-way ANOVA reveals a significantly increased hypertrophy in all muscle types of the *Ttn*<sup>Δ112-158</sup> mice (male mice, group sizes, 5–13). (D) Cross-sectional area (CSA) of muscles. CSA was measured in passive muscles held at their slack length in 2 month-old mice (group size 5–9). Two-way ANOVA reveals no significant genotype effect on CSA with a multiple comparison analysis revealing no genotype differences for individual muscle types.

DOI: <https://doi.org/10.7554/eLife.40532.020>

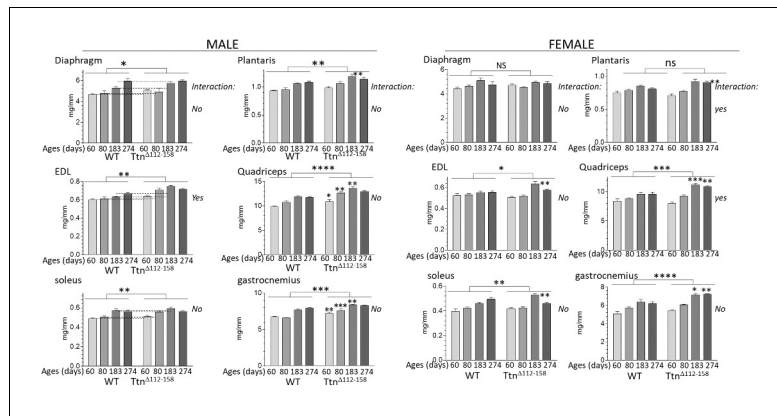

**Figure 10—figure supplement 1.** Muscles of  $Ttn^{\Delta 112-158}$  mice are hypertrophied. Hypertrophy is expressed as muscle weight (mg) normalized to tibia length (mm). Two-way ANOVA reveals a significantly increased hypertrophy in most muscle types of the  $Ttn^{\Delta 112-158}$  mice. Most of the muscle types do not have a significant interaction term with age indicating that the genotype effect on muscle weight does not vary with age.

DOI: <https://doi.org/10.7554/eLife.40532.021>

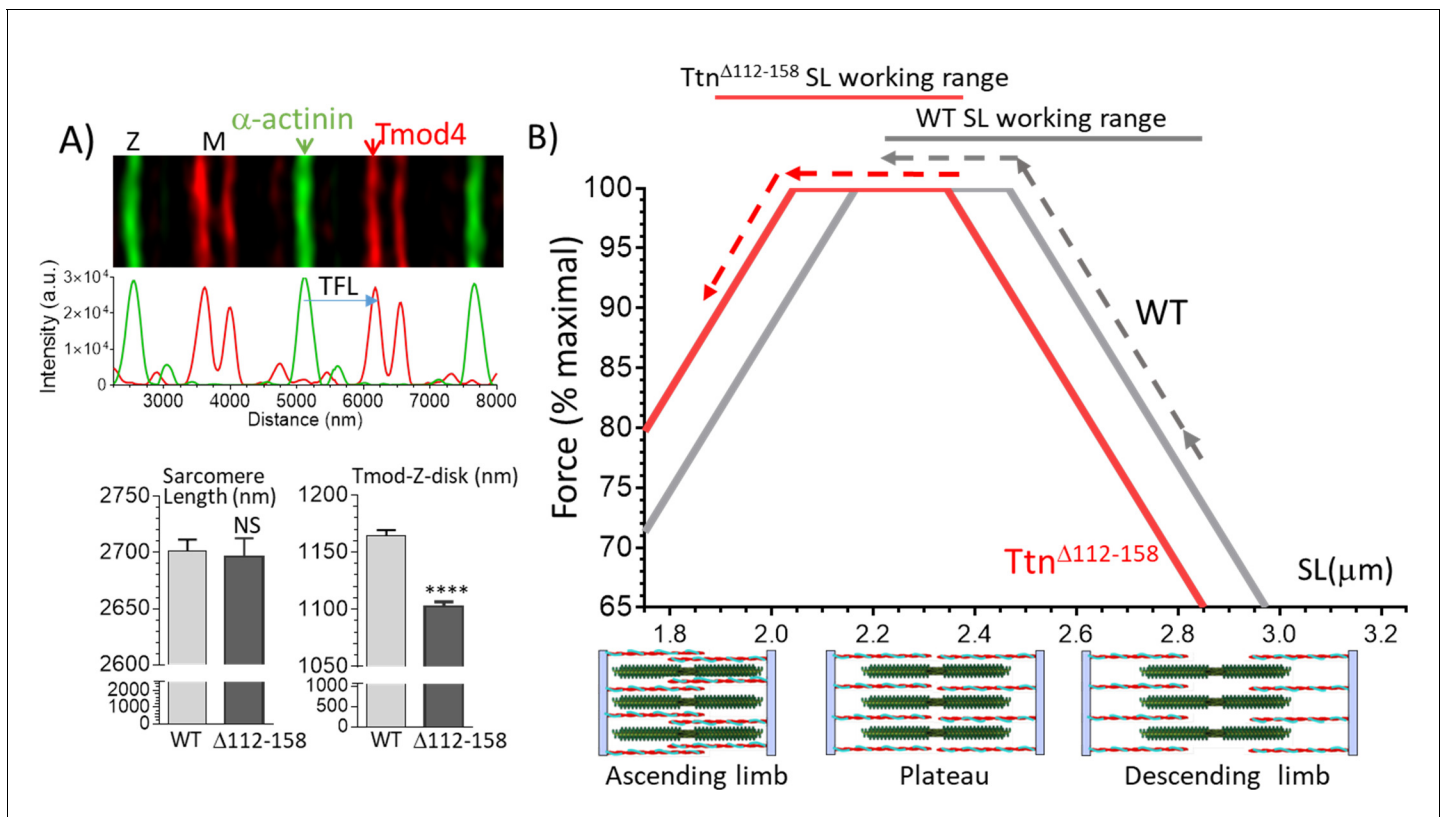

**Figure 11.** Thin filament length (TFL) and predicted force-sarcomere length (SL) relation. (A) TFL was measured in diaphragm muscle by super-resolution optical microscopy using the TFL-pointed end capping protein Tmod4. Top shows a WT example. Bottom: analyzed results. Sarcomere length (left) is not different. TFL (Tmod-Z-disk distance) is significantly reduced from 1165 nm in WT to 1102 nm in  $Ttn^{\Delta 112-158}$  diaphragm. (B) Top, Predicted force-sarcomere length relation using the measured TFLs: WT grey;  $Ttn^{\Delta 112-158}$  red. Broken lines indicate the sarcomere length working ranges of the WT and  $Ttn^{\Delta 112-158}$  diaphragm (from **Figure 8D**). (B) Bottom, schematic of sarcomeres on ascending limb (left), plateau (middle) and descending limb (right) of the force-SL relation. Green: thick filaments, red: thin filaments. (Note the central region of the thick filament that is devoid of myosin heads is known as the bare zone.)

DOI: <https://doi.org/10.7554/eLife.40532.022>

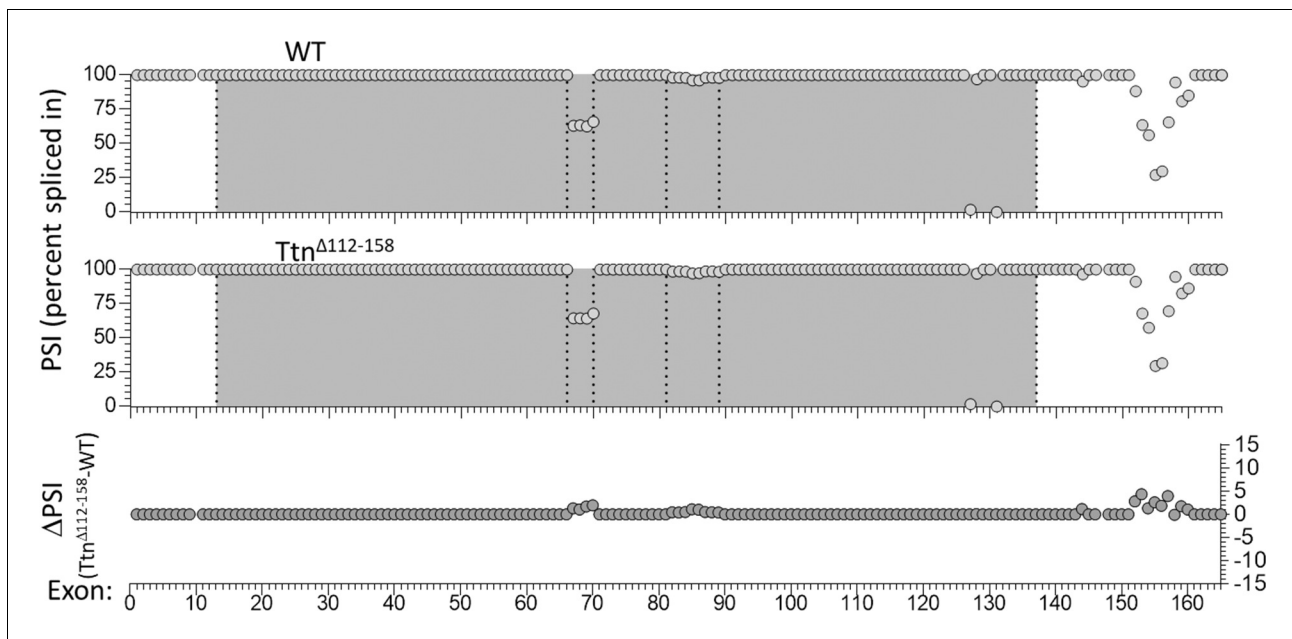

**Figure 11—figure supplement 1.** Nebulin exon expression analysis in diaphragm muscle. RNAseq-based nebulin exon expression of diaphragm muscle, expressed as percent spliced in (PSI) in WT (top) and  $Ttn^{\Delta 112-158}$  mice (middle), and the PSI difference between the two genotypes (bottom). Several exons in the middle of the gene (exons 66–70 and exons 82–89) are slightly upregulated (<5%) in the  $Ttn^{\Delta 112-158}$  diaphragm but differences are not significant. In these regions a super-repeat duplication and a super-repeat triplication are found (making for 25 super-repeats in the mouse Neb gene). Several exons towards the C-terminus (Z-disk region) are also slightly upregulated, but differences are not significant.

DOI: <https://doi.org/10.7554/eLife.40532.023>

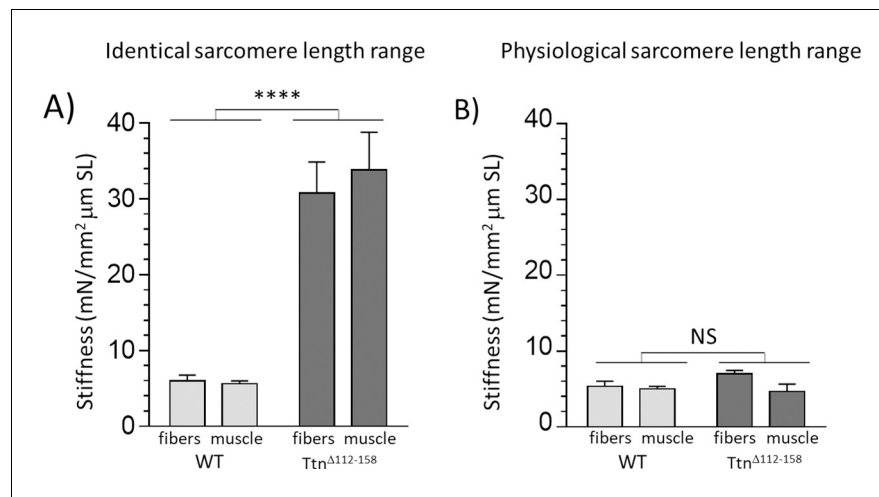

**Figure 12.** Passive muscle stiffness at the physiological sarcomere length range. Passive stiffness in *Ttn*<sup>Δ112-158</sup> and WT EDL 5<sup>th</sup> toe muscle at an identical sarcomere length range (A) and at the physiological sarcomere length of each genotype (B). Data in A represent the average stiffness in the sarcomere length range 2.45–2.75 μm (data from **Figure 5C**, inset) and data in B represent the average stiffness in the sarcomere length range 2.35–2.85 μm for WT and 2.12–2.55 μm for *Ttn*<sup>Δ112-158</sup>, representing the physiological sarcomere length range determined in **Figure 8D**. It is notable that within the physiological sarcomere length range (B) passive stiffness of the two genotypes is the same. (No differences between results of single fibers and whole muscle.) Legends for the supplementary figures.

DOI: <https://doi.org/10.7554/eLife.40532.024>
